# Supplementary material for: Developing a GIS-based water poverty and rainwater harvesting suitability maps for domestic use in the Dead Sea region (West Bank, Palestine)
Source: Copernicus journal article supplement (doi:10.5194/hess-2018-344), 2018-06-28
Supplement: Supplementary file [file hess-2018-344-RC2-supplement.pdf]

# Developing a GIS-based water poverty and rainwater harvesting suitability maps for domestic use in the Dead Sea region (West Bank, Palestine)

Sameer M. Shadeed<sup>1</sup>, Tariq G. Judeh<sup>1</sup>, Mohammad N. Almasri<sup>2</sup>

<sup>1</sup>Water and Environmental Studies Institute, An-Najah National University, Nablus, West Bank, Palestine

<sup>2</sup>Civil Engineering Department, An-Najah National University, Nablus, West Bank, Palestine

Correspondence to: Sameer M. Shadeed ([sshadeed@najah.edu](mailto:sshadeed@najah.edu))

**Abstract.** In Dead Sea region as arid to semi-arid regions, water shortage and the inability to satisfy the increasing domestic water demand have been threatening the sustainable development. In such situations, domestic rainwater harvesting is considered an efficient management option to combat water poverty. This paper aims to develop a domestic water poverty (DWP) and domestic rainwater harvesting suitability (DRWHS) maps for the West Bank, Palestine (5860 km<sup>2</sup>). The Analytical Hierarchy Process (AHP) together with the GIS-based weighted overly summation process (WOSP) was utilized in the development of these maps. ~~total of 12 and four different assessing criteria were used in the development of DWP and DRWHS maps, respectively.~~ Results of DWP map indicate that about 57 % of the West Bank is under high to very high domestic water poverty. On the other hand, the DRWHS map indicates that about 60 % of the West Bank can be classified as high to very high suitable areas for domestic rainwater harvesting. Furthermore, DWP and DRWHS maps intersection indicates that around 31 % of the West Bank areas could be classified as high potential locations for adopting rainwater harvesting techniques for domestic purposes. Finally, the developed maps are of high value for different stakeholders to realize the importance of promoting rainwater harvesting for a self-sustaining and self-reliant domestic water supply in high water poverty areas in the Dead Sea region generally and in the West Bank particularly.

**Keywords:** Water poverty mapping, rainwater harvesting suitability mapping, domestic water supply, water resources management, AHP, GIS, Dead Sea, West Bank (Palestine).

## 1 Introduction

Water is the most influential and key limiting factor for sustainable development. In the 21st century, the most serious challenge for millions of people, worldwide, is the lack of access to safe and clean water for domestic purposes (Worm and Hattum, 2006).

In Dead Sea region, among which the West Bank (Palestine), water shortage is a dominant problem jeopardizing the sustainability of water resources for different uses (PWA, 2011). This situation became worst further due to the population growth and climate change that imposed a tremendous stress on the conventional water supplies (PWA, 2011). Furthermore, the existing political situation controls the Palestinian accessibility to their water resources (Judeh et al., 2017). In 2015, the estimated annual water supply-demand gap for domestic purposes for the entire West Bank is about 32 million cubic meters (MCM) (PWA, 2015). However, the gap will increase unless the Palestinians gain access to their available surface and ground water resources.

DWP is a simple, straightforward and efficient tool to visualize and represent the spatial variation of domestic water poverty index (DWPI) at governorate and country levels (Thakur et al., 2014). DWP map has several pros; it gives a better understanding of the relationship between the physical availability of water, its quality and suitability for domestic use and

37 its accessibility. It also forms a tool for monitoring programs in the water sector and it helps in improving the situation of  
38 communities that suffer from water poverty (van der Vyver and Jordaan, 2011).

39 The different areas within a governorate can be defined as water poor or water rich using water poverty index (WPI) approach.  
40 WPI is not only limited to the physical availability of water, it also considers the social, economic, political and environmental  
41 factors associated with water poverty (Coppin and Richards, 1990; Sullivan et al., 2003; Neupane et al., 2015). This approach  
42 has been applied in the analysis of water stresses in many countries all over the world such as; United State of America  
43 (James et al., 2007), India (Kher et al., 2012), South Africa, Tanzania and Sri Lanka (Mlote et al., 2002), Nepal (Thakur et  
44 al., 2014), and West Bank (Palestine) (Isaac et al., 2008).

45 Generally, water-poor areas should look for new, safe, sustainable and unconventional sources of water. For instance,  
46 rainwater harvesting (RWH) has deemed as a viable alternative compared with other conventional water supply options  
47 (Abdulrazzak, 2003).

48 RWH is the process of collecting and storing rainwater in order to be used afterwards for different uses among which the  
49 domestic one (Siegert, 1994; Gould and Nissen-Petersen, 1999). It is considered an ancient technology that can be dated back  
50 to biblical times (Evenari et al., 1971; Critchley et al., 1991). In Palestine and Greece, RWH had been extensively used 4000  
51 years ago (Evenari et al., 1971; Critchley et al., 1991).

52 Adopting RWH will potentially enhance the economic, environmental and social development especially in arid and semi-  
53 arid regions under uncertainty of water supply (UNEP, 2009). The use of RWH for domestic purposes entails that water  
54 quality is sufficiently good and within the allowable permissible limits of drinking water quality standards. Mostly, the  
55 quality of harvested water can be controlled by proper practices (e.g. cleaning of collecting surface (roofs) and the flush away  
56 of first storm) and simple disinfections techniques if needed (African Development Bank, 2010; Meera and Ahammed, 2018).  
57 In arid and semi-arid regions, domestic water productivity was enhanced by adopting RWH for many years (Boers et al.,  
58 1986; Bruins et al., 1986; Critchley et al., 1991; Abu-Awwad and Shatanawi, 1997; van Wesemael et al., 1998; Oweis et al.,  
59 1999; Li et al., 2000; Li and Gong, 2002; Rosegrant et al., 2002; Ngigi et al., 2005; Ngigi, 2006; Oweis and Hachum, 2006;  
60 Rockström and Barron, 2007; Mwenge Kahinda et al., 2007; Campisano et al., 2017; Singh and Turkiya, 2017; Tamaddun  
61 et al., 2018). In the West Bank (Palestine), RWH is widely used at household level in rural areas (Shadeed, 2011). Shadeed  
62 2011 found that approximately 40 % and 11 % of the West Bank areas are suitable and highly suitable for RWH for the  
63 different uses, respectively. Shadeed and Lange 2010 have confirmed the possibility of RWH to bridge the deficiencies in  
64 water supply in the Faria catchment located in the northeastern part of the West Bank.

65 This research aims at mapping the DWP and DRWHS maps for the entire West Bank. Thus, an integrated approach using  
66 GIS-based MCDA was adopted. The MCDA approach entails that the choice is built on a predetermined and limited number  
67 of decision variables (criteria) described by their attributes. Hence, the most influential criteria (layers) driving both DWP  
68 and DRWHS mapping were identified, weighted and scored using AHP. GIS-based WOSP was then used to develop both  
69 the DWP and DRWHS maps.

70 ~~This paper is of high value as the spatial intersection between DWP and DRWHS maps were studied for the first time in the~~  
71 ~~West Bank. This in turn can help decision makers to enhance the sustainable management of the water resources in the high~~  
72 ~~domestic water poverty yet high rainwater harvesting suitable areas by adopting proper RWH techniques.~~

73 **2 Study Area**

74 West Bank (Palestine) is located to the west of the Dead Sea in the Middle East. It has an area of about 5,860 km<sup>2</sup>.  
75 Administratively, it is divided into 11 governorates with a total population of approximately 2.9 million (PCBS, 2017) (see  
76 Figure 1).

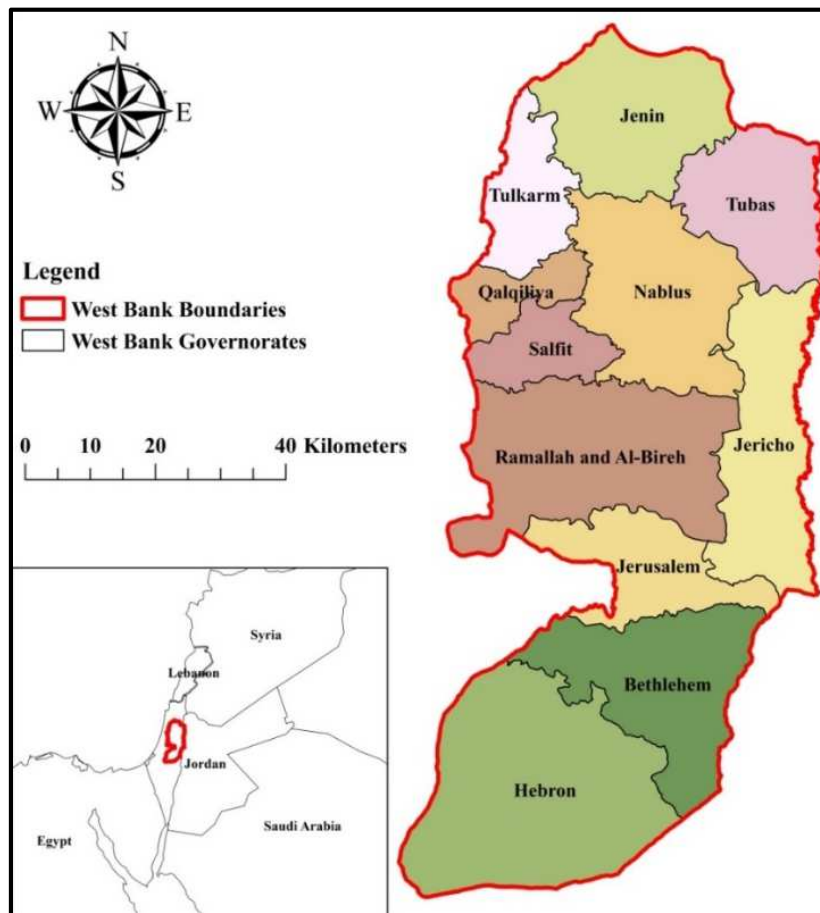

77  
78 **Figure 1: Regional Location of the West Bank**

79 Water supply for different uses in the West Bank is very limited and does not enough to satisfy the increasing water demand.  
80 Furthermore, the existing political situation adds another constraint on the availability and accessibility of water resources  
81 for Palestinians. Water supply is being available either from local groundwater wells and springs or purchased from Israeli  
82 Water Company (Mekorot). In 2015, the domestic water supply-demand gap in the West Bank was 32 MCM, whereas the  
83 required domestic supply-demand gap (including losses) was about 65 MCM (PWA, 2015). In 2015, on ground RWH  
84 techniques (e.g. cisterns, ponds and small scale dams) contribute to about 4 MCM for the domestic use and 3 MCM for the  
85 agricultural use in the West Bank (PWA, 2016). According to PWA water strategy of 2018, 10 MCM is potentially collected  
86 from adoption of different domestic and agriculture RWH techniques (PWA, 2016).

87 The West Bank can be classified as hot and dry during summer and cool and wet in winter (UNEP, 2003). Rainfall shows  
88 high spatial and temporal variation, with long-term annual average rainfall of 450 mm, which is equivalent to rainfall volume  
89 of about 2500 MCM (PWA, 2013). However, most of the annual rainfall (about 80 %) is usually occurred in winter (Shadeed,  
90 2012). Under dry conditions, West Bank has a runoff curve number ranged from 21 to 74 with an average value of about 50  
91 (Shadeed and Almasri, 2010). This is an indication of the high runoff potential in the country which should be utilized through  
92 implementation of proper RWH techniques.

93 The land use map of the West Bank is classified into four main classes; rough grazing (62 %), agricultural practices (32 %),  
 94 built-up areas (5 %) and Israeli settlements (1 %) (MoA, 2017). Moreover, the West Bank is characterized by different soil  
 95 textures such as; clay, clay loam, loamy, sandy loam and bare rock covering 47, 31, 9, 8 and 5 % of the study area respectively  
 96 (MoA, 2017). The elevations in the study area ranges from 375 meter below mean sea level in the vicinity of the Dead Sea  
 97 in Jericho to 1000 meter above mean sea level in the mountains of Hebron (MoP, 1997).

### 98 3 Materials and Methods

99 The overall methodological framework used in this research for developing both DWP and DRWHS maps for the entire  
 100 West Bank is illustrated in Figure 2.

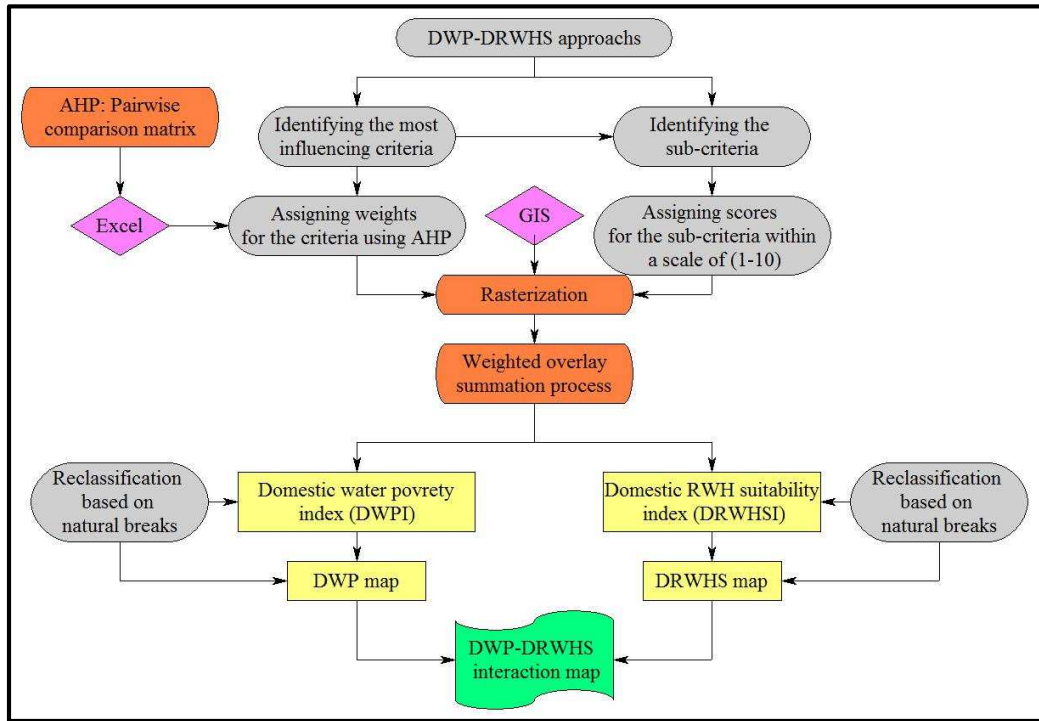

101  
 102 **Figure 2: methodological framework**

103 WPI explains water poverty in view of five key components; access, capacity, environment, resource and use (Gould and  
 104 Nissen-Petersen, 1999). In this study, the five key components were objectively represented by twelve influencing factors  
 105 (criteria) that affect the WPI in the West Bank (see Table 1). For these criteria, data were collected from different sources  
 106 which include; Palestinian Water Authority (PWA), Palestinian Central Bureau of Statistics (PCBS) and water departments  
 107 at municipalities.

108 The most influencing criteria on the DRWHS map in the West Bank were identified. These criteria are: rainfall depth  
 109 (RD), curve number (CN), surface slope (SS) and land use (LU). The spatial extent of the long term average annual RD  
 110 was obtained from the records of the existing rain-gauges using the inverse distance weighting method (IDW). The CN  
 111 map was developed for the entire West Bank (Shadeed and Almasri, 2010). The digital elevation model (DEM) was  
 112 processed to determine the SS layer. The LU map available at the Ministry of Agriculture (MoA) database was used.

113 Different weights were assigned for the different criteria used in each map by conducting the AHP pairwise comparison  
 114 matrix. The matrices were filled using a scoring system (preference values) from (1 to 9) in order to reflect the preference  
 115 and importance of the used criteria (Saaty, 1980) (See Table 2 and Table 3).

116 Once the pairwise comparison matrices were completed by different preference values, the AHP provides researchers the  
117 opportunity to check and enhance the matrices consistency. However, matrices consistency was measured by estimating the  
118 consistency ratio using the following formulas (Saaty, 1980):

$$119 \quad CR = \frac{CI}{RI}$$
$$120 \quad CI = \frac{\lambda - n}{n - 1}$$

121 Where,

122 *CR* consistency ratio

123 *CI* consistency index

124 *RI* random consistency index

125  $\lambda$  normalized principal eigenvector

126 *n* number of constraints (criteria).

127 The matrix could be considered a consistent one if the *CR* value is smaller or equal to 0.1. Otherwise, it is considered  
128 inconsistent and needs to be revised (Saaty, 1996, 2000). According to the different preference values used in the pairwise  
129 comparison matrices shown in Table 2 and Table 3, the *CR* values for DWP and DRWHS matrices were equal to 0.04 and  
130 0.01 respectively. So, both of them are consistent.

131 Each of the criteria used in DWP and DRWHS maps were divided into five sub-criteria, each of them were assigned a score  
132 from 1 to 10 (see Table 4 and Table 5). However, DWP and DRWHS increased as the score closed to 10. Thereafter,  
133 rasterization (cell size of 100 m by 100 m) of the different criteria based on their sub-criteria scores were manipulated by  
134 GIS (see Figure 3 and Figure 4).



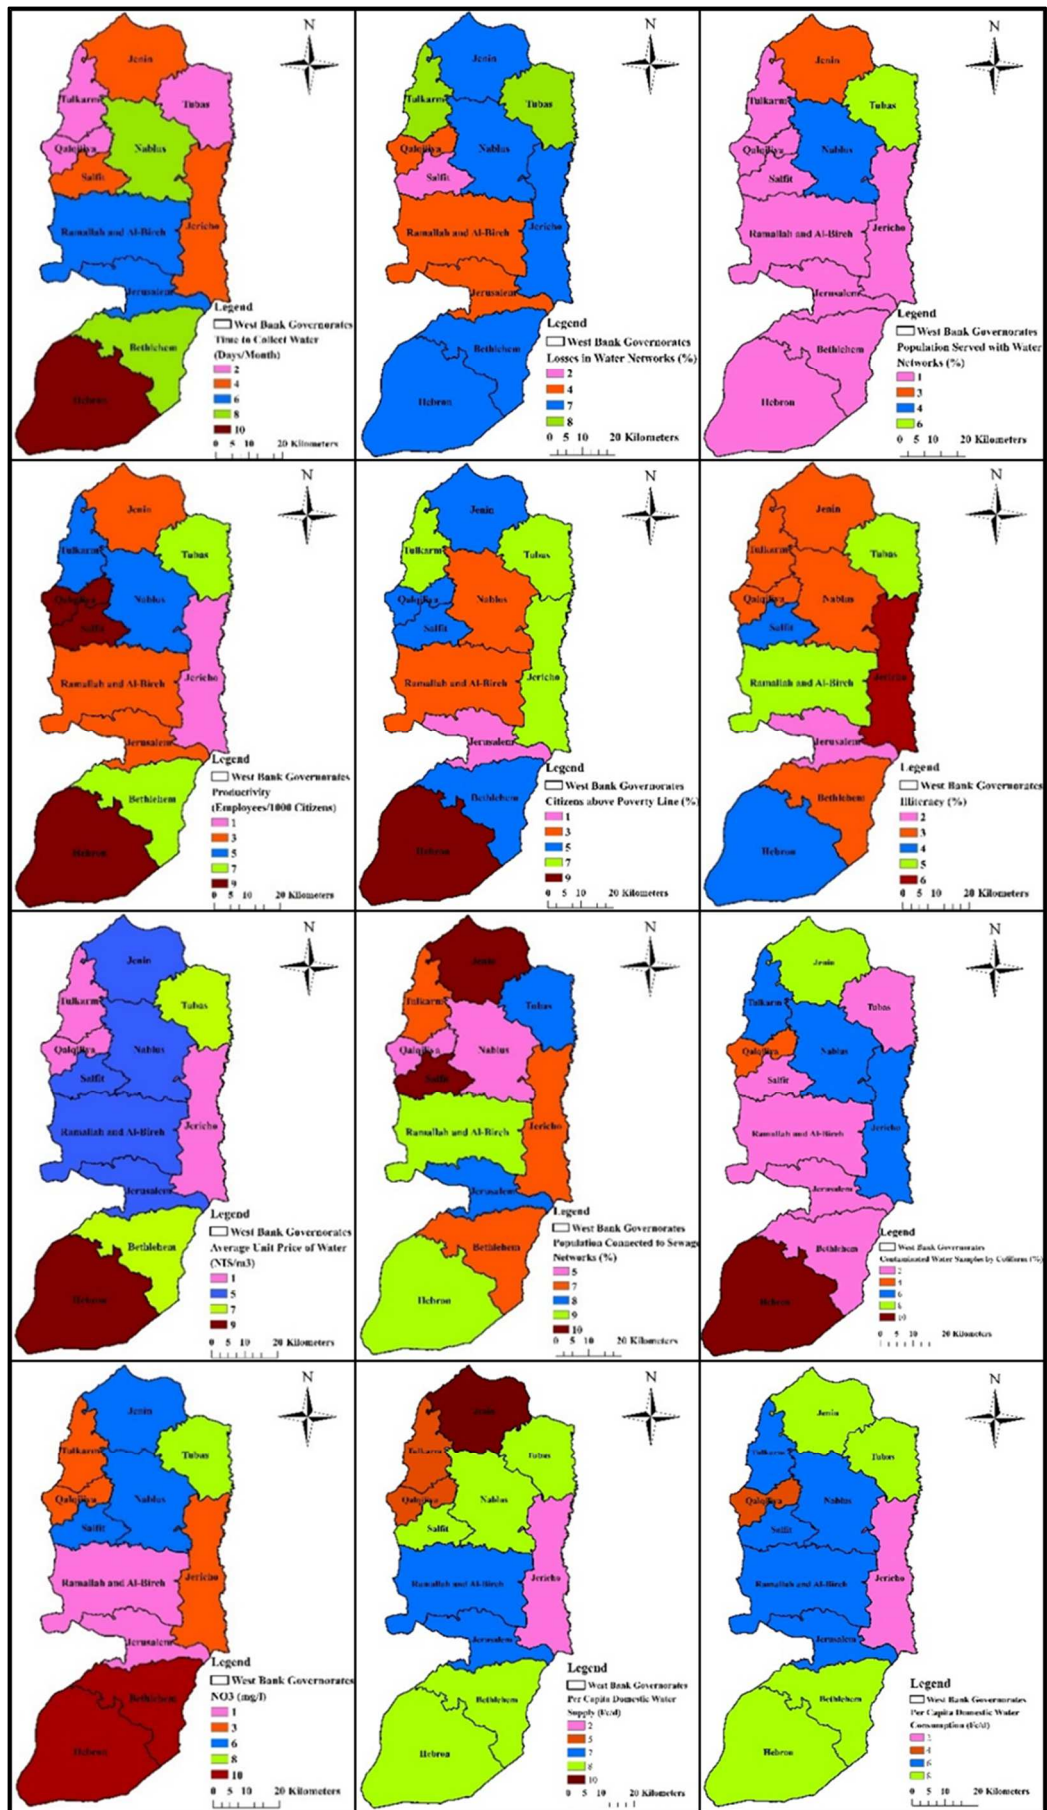

Figure 3: The scored rasters of the 12 DWP criteria for the West Bank

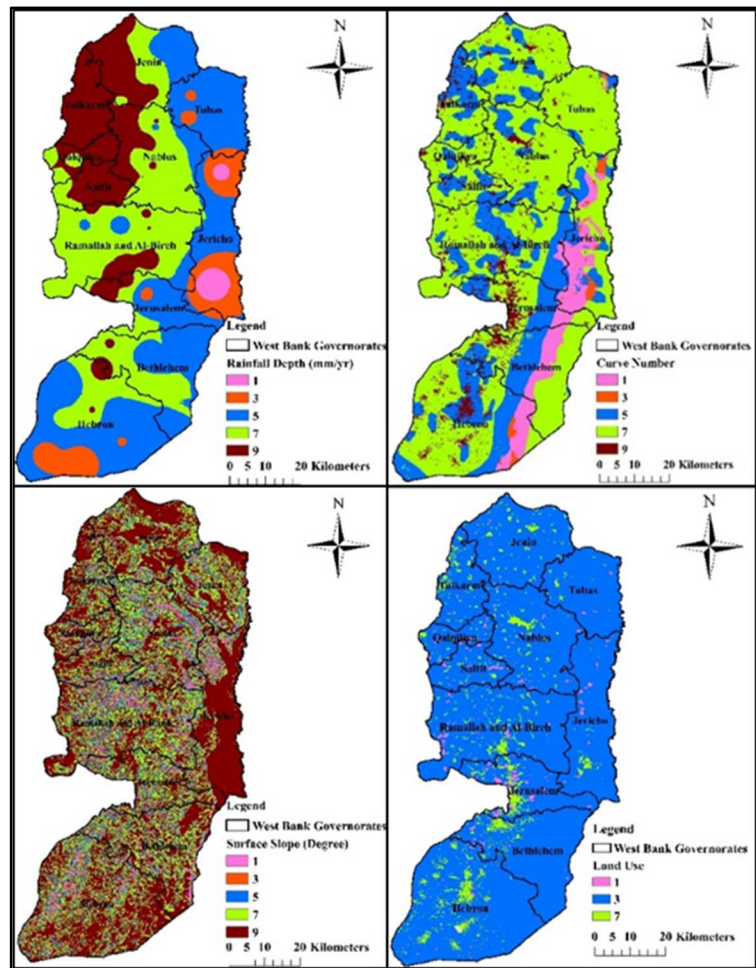

Figure 4: The scored rasters of the four DRWHS criteria for the West Bank

137  
138

139 GIS is used to estimate DWPI and DRWHSI through the application of WOSP for the different layers (criteria) used. WOSP  
140 method applies a weighted linear formula in decision-making analysis (Store and Jokimäki, 2003). It combines the different  
141 layers based on two main parameters; the scores for the different sub-criteria for each layer and the weight of the layer itself.  
142 However, DWPI and DRWHSI were estimated using the following formula (Malczewski, 1999):

143  $(DWPI \text{ or } DRWHSI)_i = \sum_{j=1}^n S_{ij} * W_j$

144 Where,

145  $(DWPI \text{ or } DRWHSI)_i$ : the final DWP or DRWHS index for each cell i

146  $S_{ij}$ : the DWP or DRWHS score for each cell i in each layer j

147  $W_j$ : the normalized weight for each layer j used in DWP or DRWHS maps.

148 **4 Results and Discussion**

149 **4.1 DWP Map**

150 ~~Based on the methodological framework of the DWP mapping, and after performing the WOSP, the DWP map was~~  
151 ~~developed for the entire West Bank (see Figure 5).~~ The map was classified into five water poverty categories (very low,  
152 low, moderate, high, and very high) by natural breaks approach.

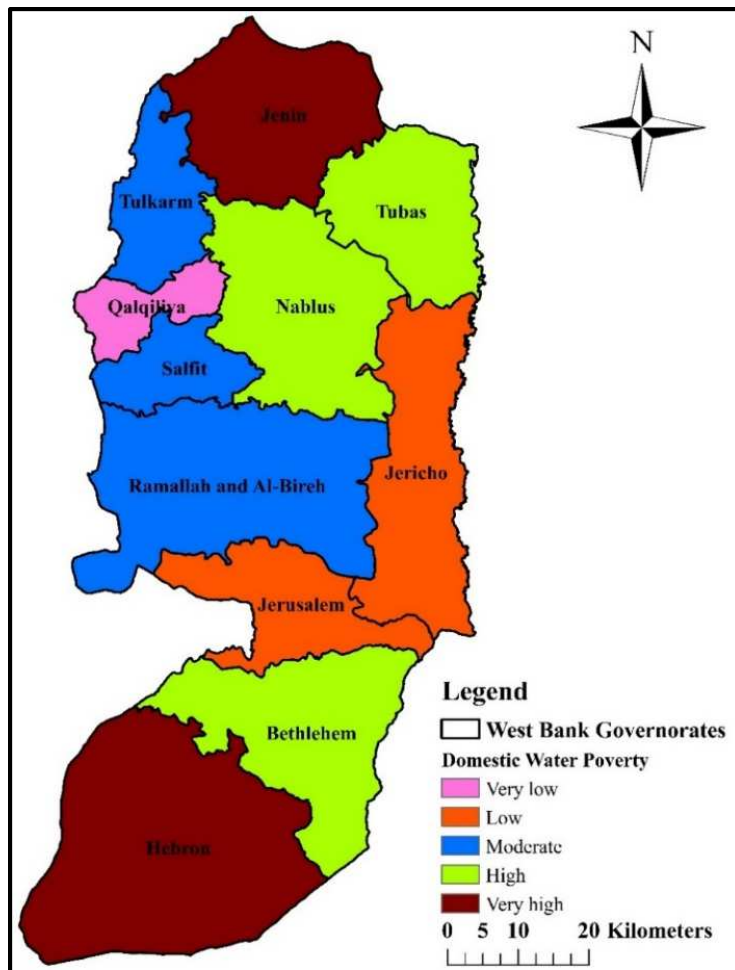

Figure 5: DWP map for the West Bank

153  
154

155 Figure 5 shows that the governorates characterized by very high DWP are found to the very southern (Hebron) and very  
 156 northern parts (Jenin) of the West Bank which have about 36 % of the total West Bank population (PCBS, 2017). Bethlehem,  
 157 Nablus and Tubas governorates suffers from high DWP conditions. In contrast, the results indicate that Qalqiliya  
 158 governorate has the lowest DWP. Whereas low to medium DWP are prevailing in the other governorates. However, the area  
 159 percentages of the different DWP classes in the West Bank were estimated and illustrated in Figure 6.

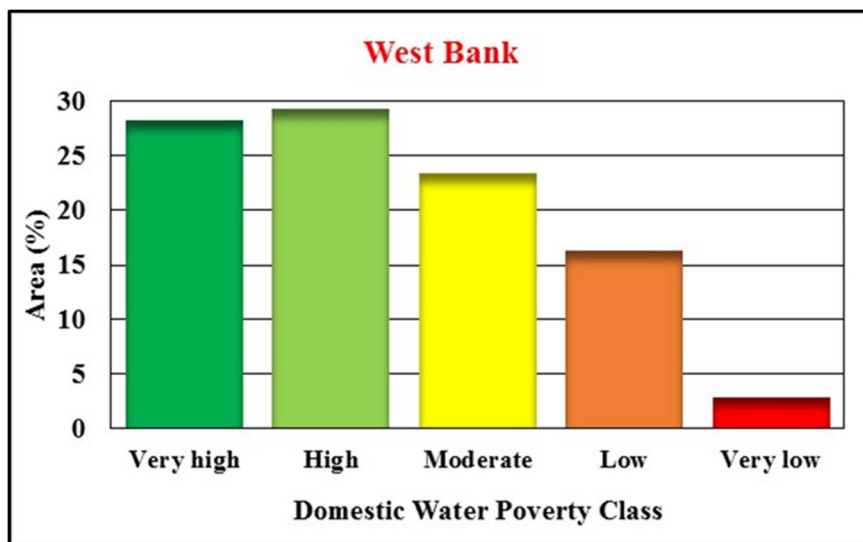

Figure 6: Area percentages of the different DWP classes in the West Bank

160  
161



162 Generally, the results presented in the previous figure summarize the domestic water shortage in the West Bank. The high  
163 to very high DWP classes form the largest area in the West Bank (approximately 57 %), and includes around 59 % of the  
164 total West Bank population. The areas characterized by moderate DWP conditions occupy about 24 % of the total West  
165 Bank area, and includes around 21 % of the total West Bank population. However, low to very low DWP accounts for 19  
166 % of the total West Bank area wherein 20 % of population are living.

#### 167 4.2 DRWHS Map

168 According to the methodological framework of the DRWHS mapping, and after performing the WOSP, the DRWHS map  
169 was developed for the entire West Bank (see Figure 7). The map was classified into five suitability categories (very low,  
170 low, moderate, high, and very high) by natural breaks approach.

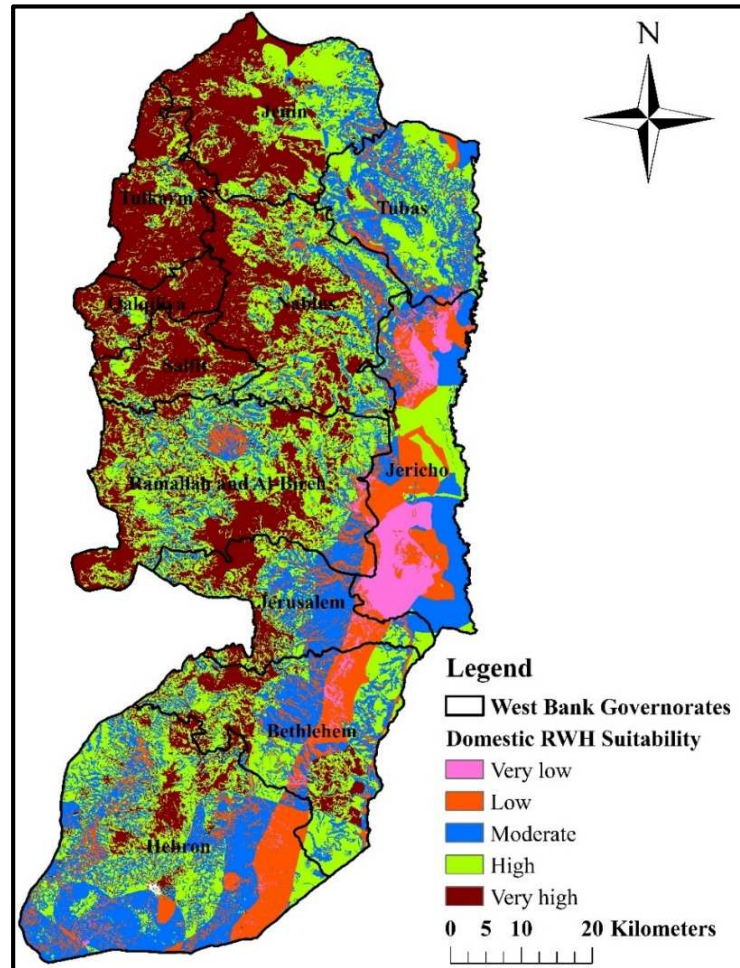

171  
172 **Figure 7: DRWHS map for the West Bank**

173 The developed DRWHS map indicates that the area characterized by very high suitable areas are distributed across the  
174 north-western part of the West Bank, except for small portions that are located in the middle and southern mountains. In  
175 contrast, the eastern part of the West Bank is classified as very low to low suitable areas. It is clear that the developed  
176 DRWHS map is highly influenced by both RD and CN criteria. Where, the trend for rainfall and runoff potential increased  
177 north-west and decreased south-east.

178 Generally, the area percentages of the different DRWHS classes in the different West Bank governorates are illustrated in  
179 Figure 8.

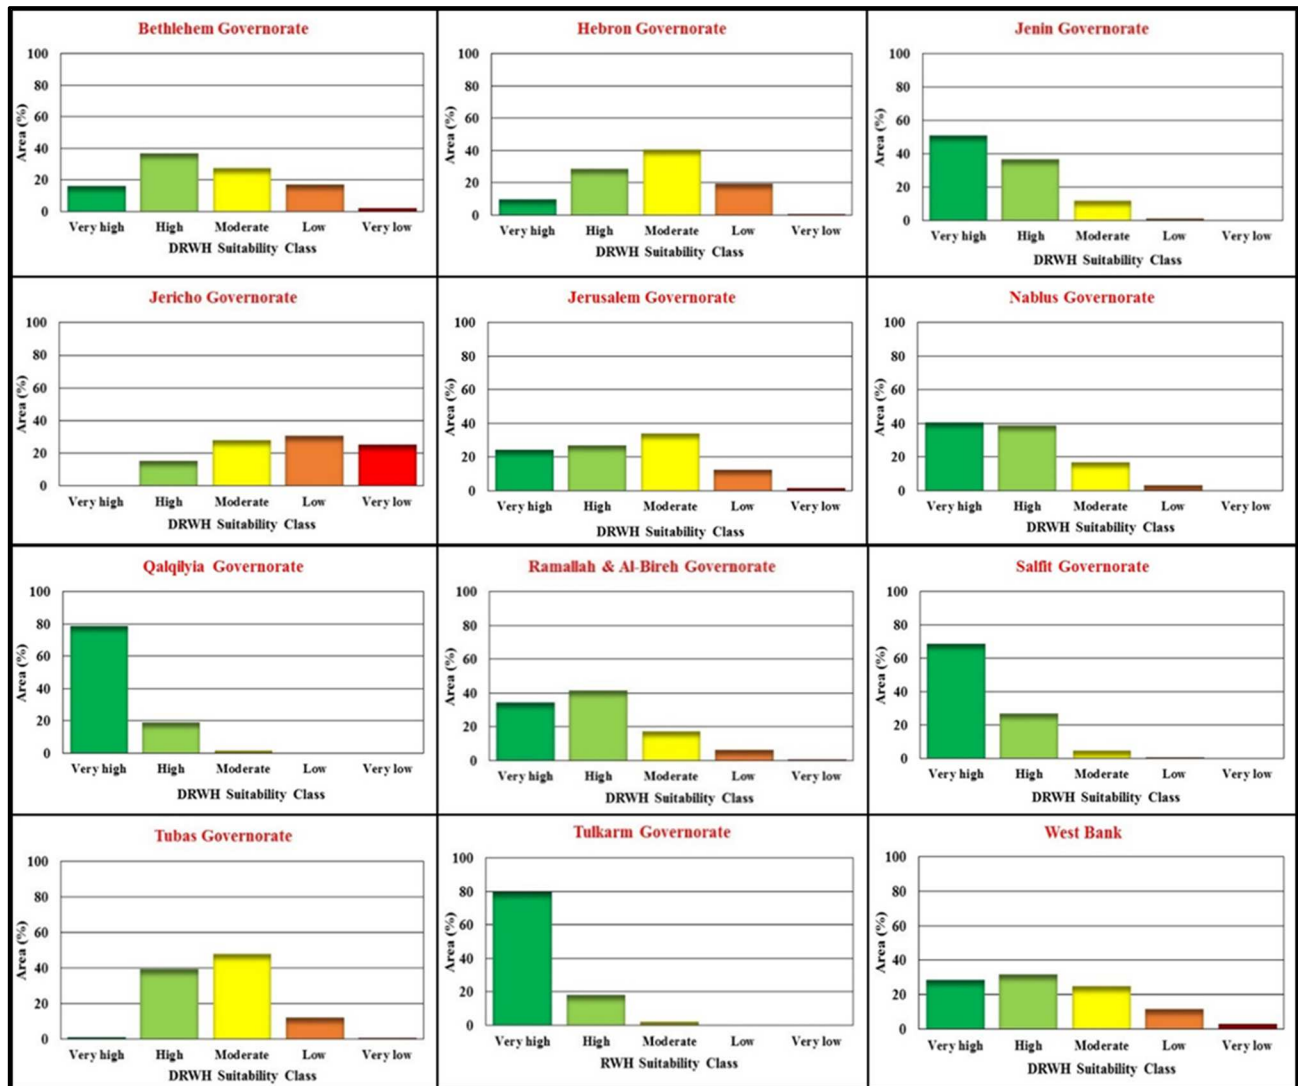

**Figure 8: Area percentages of the different DRWHS classes in the different West Bank governorates**

182  
183

184 It's obvious that the high to very high DRWHS areas are dominant (75 %-95 %) in Qalqilyia, Tulkarm, Salfit, Jenin, Nablus  
 185 and Ramallah & Al-Bireh governorates. In general, about 60 % of the total West Bank areas are classified as high to very  
 186 high suitable for DRWH. This in turn indicates the high potential of adopting DRWH techniques in trying to bridge the  
 187 ongoing domestic supply-demand gap in the West Bank.

188 **4.3 DWPM-DRWHSM Intersection**

189 The developed DWP and DRWHS maps urged the need to identify high domestic water poverty areas yet highly suitable for  
 190 DRWH. Accordingly, spatial Intersection between both maps were conducted under the GIS environment with a special  
 191 focus on areas characterized by high to very high water poverty yet high to very high suitable for DRWH purposes. Results  
 192 are illustrated in Figure 9.

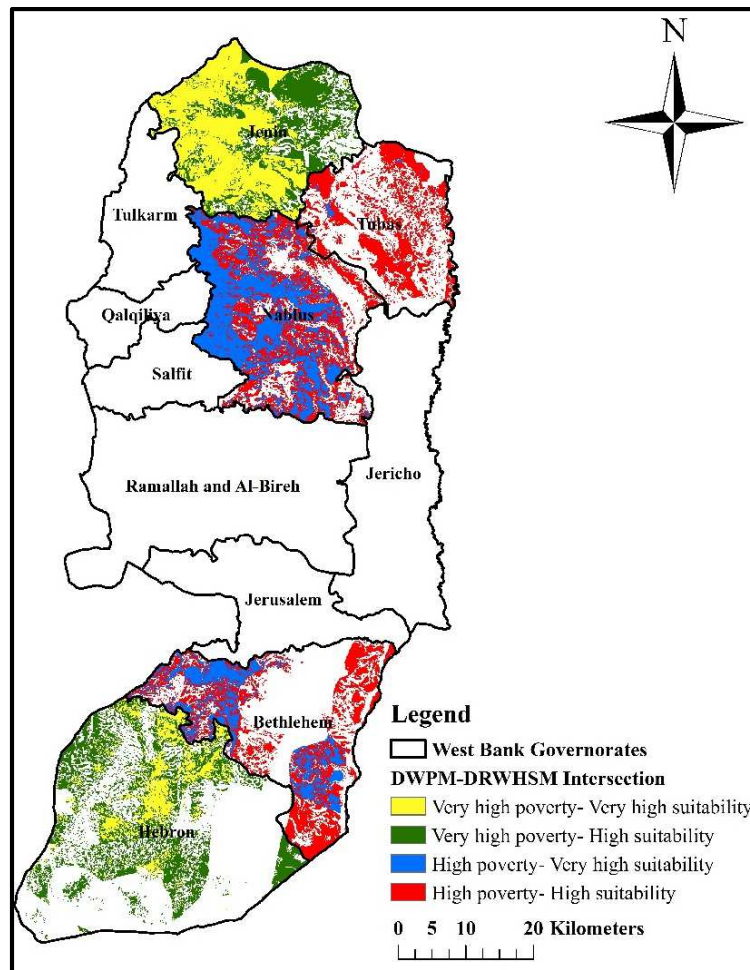

193  
194 **Figure 9: DWP-DRWHS maps Intersection for the entire West Bank**

195 It is noticed that high to very high water poverty and rainwater suitability areas are located mostly in the northern and  
196 southern parts of the West Bank which accounts for more than 30 % of the total West Bank area.

197 **5 Conclusions**

198 **This paper** came up to develop DWP and DRWHS mapping in the West Bank based on governorate scale by adopting an  
199 integrated approach using GIS-based MCDA. Research results emphasize that the GIS-based MCDA can be used to provide  
200 planners with a coherent and informative spatial DWP and DRWHS data. The use of MCDA for various influencing factors  
201 is recognized to be valuable in the mapping of the DWP and DRWHS in the West Bank. Twelve and four criteria were  
202 investigated to delineate DWP and DRWHS areas in the West Bank governorates respectively. The selection of these criteria  
203 was affected by their impacts on DWP and DRWHS, and their availability. The AHP pairwise comparison matrix approach  
204 was adopted to assign different criteria weights. It should be noticed that the obtained results have been subjective to the  
205 uncertainty of the given data. Thus, it is essential to conduct a sensitivity analysis by changing the criteria weights and  
206 criterion scores in order to quantify the severity of each one and to provide insights into the generated DWP and DRWHS  
207 maps. The results of DWP map indicate that the high to very high DWP classes form approximately 75 % of the total West  
208 Bank area. It is noticed that the spatial variations of DWP over different West Bank governorates are reliable and go in line  
209 with PWA expectation. The DRWHS map indicates that there is high potential to adopt RWH especially in north-western  
210 parts of the West Bank. Finally, although the available data are limited, the work provides an overall valuable picture about

211 the DWP and DRWHS in different West Bank governorates. This in turn indicates that even under data scarce regions and  
212 limited resources yet much can be performed to assist the decision makers through providing of essential information to  
213 mapping DWP and DRWHS areas, and thus to formulate proper strategies including the development of efficient and  
214 comprehensive water resources management options in trying to bridge the increasing water supply-demand gap for  
215 domestic purposes in the West Bank. The obtained results are promising to be regionalized for the entire Dead Sea region  
216 which are facing a series water shortage challenges.

## 217 **Acknowledgements**

218 This work was performed within the framework of the Palestinian Dutch Academic Cooperation Program on Water  
219 (PADUCO 2), funded by the Netherlands Representative Office (NRO) in Ramallah, Palestine. The financial support is  
220 gratefully acknowledged.

## 221 **References**

- 222 Abu-Awwad, A. M., and Shatanawi, M. R. (1997). Water harvesting and infiltration in arid areas affected by surface crust:  
223 Examples from Jordan. *Journal of Arid Environments*, 37(3), 443-452. [doi:10.1006/jare.1997.0301]
- 224 African Development Bank. (2010). *Assessment of Best Practices and Experience in Water Harvesting: Rainwater*  
225 *Harvesting Handbook*.
- 226 Boers, T. M., Zondervan, K., and Ben-Asher, J. (1986). Micro-catchment-water-harvesting (MCWH) for arid zone  
227 development. *Agricultural Water Management*, 12(1-2), 21-39. [doi:10.1016/0378-3774(86)90003-X]
- 228 Bruins, H. J., Evenari, M., and Nessler, U. (1986). Rainwater-harvesting agriculture for food production in arid zones: The  
229 challenge of the African famine. *Applied Geography*, 6(1), 13-32. [doi:10.1016/0143-6228(86)90026-3]
- 230 Campisano, A., D'Amico, G., and Modica, C. (2017). *Water Saving and Cost Analysis of Large-Scale Implementation of*  
231 *Domestic Rain Water Harvesting in Minor Mediterranean Islands*. Water MDPI AG, Basel, Switzerland.
- 232 Coppin, N.J., and Richards, I.G. (1990). *Use of Vegetation in Civil Engineering*. Construction Industry Research and  
233 Information Association, London.
- 234 Critchley, W., Siegert, K., Chapman, C., and Finkel, M. (1991). *Water harvesting: A Manual for the Design and*  
235 *Construction of Water Harvesting Schemes for Plant Production*. Rome: Food and Agriculture Organization of the  
236 United Nations.
- 237 Evenari, M., Shanan, L., and Tadmor, N. (1971). *The Negev: The Challenge of a Desert*. Cambridge, Massachusetts:  
238 Harvard University Press.
- 239 Gould, J., and Nissen-Petersen, E. (1999). *Rainwater Catchment Systems for Domestic Supply: Design, Construction and*  
240 *Implementation*. London: Intermediate Technology Publications.
- 241 Isaac, J., Giglioli, I., and Hilal, J. (2008). *Domestic Water Vulnerability Mapping in the West Bank /Occupied Palestinian*  
242 *Territory*. Applied Research Institute, Jerusalem.
- 243 James, W., Lisa, H., and Rebecca, T. (2007). Water and Poverty in the United States. *Geoforum*. 38. 801-814.  
244 10.1016/j.geoforum.2006.08.007.
- 245 Judeh, T., Haddad, M., and Özerol, G. (2017). Assessment of water governance in the West Bank, Palestine. *International*  
246 *journal of global environmental issues*, 16(1-3), 119-134. [DOI: 10.1504/IJGENVI.2017.083426]

247 Kher, J., Aggarwal, S., and Punhani, G. (2012). Climate Change and Water Poverty: The Indian Scenario. Indian Research  
 248 Journal of Extension Education, Special Issue (Volume II).

249 Li, F. R., Cook, S., Geballe, G. T., and Burch, W. R. (2000). Rainwater harvesting agriculture: An integrated system for  
 250 water management on rainfed land in China's semiarid areas. *AMBIO*, 29(8), 477-483.

251 Li, X. Y., and Gong, J. D. (2002). Compacted microcatchments with local earth materials for rainwater harvesting in the  
 252 semiarid region of China. *Journal of Hydrology*, 257(1-4), 134-144. [doi:10.1016/S0022-1694(01)00550-9]

253 Malczewski, J. (1999). GIS and Multicriteria Decision Analysis. John Wiley & Sons, Inc. New York, 392pp.

254 Meera, V., and Ahammed, M. (2018). Factors Affecting the Quality of Roof-Harvested Rainwater. In: Sarma, A., Singh,  
 255 V., Bhattacharjya, R., and Kartha S. (eds) *Urban Ecology, Water Quality and Climate Change*. Water Science and  
 256 Technology Library, vol 84. Springer, Cham.

257 Ministry of Agriculture (MoA). (2017). GIS based data based.

258 Ministry of Planning (MoP). (1997). MoP Database. Open Files and Personal Communications. Ramallah, Palestine.

259 Mlote, S., Sullivan, C., and Meigh, J. (2002). Water poverty index: a tool for integrated water management.

260 Mwenge Kahinda, J., Taigbenu, A.E., and Boroto, R.J. (2007). Domestic rainwater harvesting to improve water supply in  
 261 rural South Africa. *J. Phys. Chem. Earth* 32, 1050-1057.

262 Neupane, M., and Bhatta, M.R., et al. (2015). GIS supported Water Use Master Plan: a planning tool for Integrated Water  
 263 Resources Management in Nepal. In: Srivastava, P.K., Pandey, P.C., Kumar, P., Raghubanshi, A.S., Han, D. (Eds.),  
 264 *Geospatial Technology for Water Resource Development*. Taylor and Francis.

265 Ngigi, S. N., Savenije, H. H. G., Rockström, J., and Gachene, C. K. (2005). Hydro-economic evaluation of rainwater  
 266 harvesting and management technologies: Farmers' investment options and risks in semi-arid Laikipia district of  
 267 Kenya. *Physics and Chemistry of the Earth, Parts A/B/C*, 30(11-16), 772-782. [doi: 10.1016/j.pce.2005.08.020]

268 Ngigi, S.N. (2006). Hydrological impacts of land use changes on water resources management and socio-economic  
 269 development of upper Ewaso Ng'iro river basin in Kenya. PhD Dissertation, UNESCO-IHE/Technical University  
 270 of Delft, Netherlands. AA Balkema Publishers, The Hague.

271 Oweis, T., and Hachum, A. (2006). Water harvesting and supplemental irrigation for improved water productivity of dry  
 272 farming systems in West Asia and North Africa. *Agr. Water Manage.* 80, 57-73.

273 Oweis, T., Hachum, A., and Kijne, J. (1999). Water Harvesting and Supplemental Irrigation for Improved Water Use  
 274 Efficiency in Dry Areas. Colombo, Sri Lanka: International Water Management Institute.

275 Palestinian Central Bureau of Statistics (2017). Population. Retrieved March 25, 2018, from  
 276 <http://www.pcbs.gov.ps/Downloads/book2364.pdf>

277 PWA (2011). Annual Status Report on Water Resources, Water Supply, and Wastewater in the Occupied State of Palestine.

278 PWA (2013). Palestinian Water Sector: Status report of water resources in the occupied state of Palestine.

279 PWA (2015). Unpublished Water Supply Report.

280 PWA (2016). Water Authority Strategic Plan 2016-2018.

281 Rockström, J., and Barron, J. (2007). Water productivity in rainfed systems: overview of challenges and analysis of  
 282 opportunities in water scarcity prone savannahs. *Irrigation Sci.* 25 (3), 299-311.

283 Rosegrant, M.W., Cai, X., and Cline, S.A. (2002). *World Water and Food to 2025: Dealing with Scarcity*. International  
 284 Food Policy Research Institute (IFPRI), Washington, DC.

285 Saaty, T.L. (1980) *The Analytic Hierarchy Process: Planning, Priority Setting, Resource Allocation*, McGraw-Hill  
 286 International, New York, USA.



287 Saaty, T.L. (1996) Decision Making for Leaders: The Analytic Hierarchy Process for Decisions in a Complex World, RWS  
288 Publication, Pittsburgh, PA.

289 Saaty, T.L. (2000) Fundamentals of Decision Making with the Analytic Hierarchy Process, RWS Publications, Pittsburgh,  
290 PA.

291 Shadeed, S. (2011). Developing a GIS-based Suitability Map for Rainwater Harvesting in the West Bank, Palestine.  
292 Professional Environmental Education for Sustainable Development: Plugging the Hole. International Conference.  
293 Birzeit University, Palestine, November 2011.

294 Shadeed, S. (2012). Spatio-temporal Drought Analysis in Arid and Semi-arid Regions: A Case Study from Palestine. The  
295 Arabian Journal for Science and Engineering. 38: 2303.

296 Shadeed, S., and Almasri, M. (2010). Application of GIS-based SCS-CN method in West Bank catchments, Palestine. Water  
297 Science and Engineering, 2010, 3(1): 1-13.[doi:10.3882/j.issn.1674-2370.2010.01.001]

298 Shadeed, S., and Lange, J. (2010). Rainwater Harvesting to Alleviate Water Scarcity under Dry Conditions: a Case Study  
299 in Faria Catchment, Palestine. Water Science and Engineering, 3(2): 132-143. [doi:10.3882/j.issn.1674-  
300 2370.2010.02.002].

301 Siegert, K. (1994). Introduction to water harvesting: Some basic principles for planning, design and monitoring. Water  
302 harvesting for improved agricultural production. Proceedings of the FAO Expert Consultation. Cairo, Egypt.

303 Singh, O., and Turkiya, S. (2017). Assessing Potential for Rooftop Rainwater Harvesting: An Option for Sustainable Rural  
304 Domestic Water Supply in Arid Region of Haryana. Journal of Rural Development. 36. 49-60.  
305 10.25175/jrd/2017/v36/i1/112701.

306 Store, R., and Jokimäki, J. (2003). 'A GIS-based multi-scale approach to habitat suitability modeling', Ecological  
307 Modelling, Vol. 169, No. 1, pp.1–15.

308 Sullivan, C., Meigh, J., Giacomello, A., Fediw, T., Lawrence, P., Samad, M., Mlote, S., Hutton, C., Allan, J., Schulze, R.,  
309 Dlamini, D., Cosgrove, W., Priscoli, J., Gleick, J., Smout, I., Cobbing, J., Calow, R., Hunt, C., Hussain, A.,  
310 Acreman, M., King, J., Malomo, S., Tate, E., O'Regan, D., Milner, S., and Steyl, I. (2003). The Water Poverty Index:  
311 Development and application at the community scale. Caroline A Sullivan. [DOI: 27. 10.1111/1477-8947.00054]

312 Tamaddun, K., Kalra, A., and Ahmad, S. (2018). Potential of rooftop rainwater harvesting to meet outdoor water demand  
313 in arid regions. Journal of Arid Land. 10. 68-83. 10.1007/s40333-017-0110-7.

314 Thakur, J., Mahesh, N., and Mohanan, A. (2017). Water poverty in upper Bagmati River Basin in Nepal. Water Science.  
315 31. 10.1016/j.wsj.2016.12.001.

316 United Nations Environment Programme (UNEP). (2003). Desk Study on the Environment in the Occupied Palestinian  
317 Territories. Nairobi.

318 United Nations Environment Programme (UNEP). (2009). Rainwater Harvesting: A Lifeline for Human Well-Being.  
319 Stockholm, Sweden: Stockholm Environment Institute.

320 van der Vyver, C., and Jordaan, D. (2011). Water Poverty Mapping and its Role in Assisting Water Management.  
321 Communications of the IBIMA [DOI: 10.5171/2011.941217].

322 van Wesemael, B., Poesen, J., Benet, A. S., Barrionuevo, L. C., and Puigdefábregas, J. (1998). Collection and storage of  
323 runoff from hillslopes in a semi-arid environment: Geomorphic and hydrologic aspects of the aljibe system in  
324 Almeria Province, Spain. Journal of Arid Environments, 40(1), 1-14. [doi: 10.1006/jare.1998.0429]

325 Worm, J., and Hattum, V. (2006). Rainwater harvesting for domestic use. Wageningen: Agromisa Foundation and CTA.

**Table 1: WPI components and the associated influencing factors**

| WPI key components | Influencing factors                                                                                                                                                                                                                 |
|--------------------|-------------------------------------------------------------------------------------------------------------------------------------------------------------------------------------------------------------------------------------|
| Access             | <ul style="list-style-type: none"> <li>• Time to collect water (TCW)</li> <li>• Losses in water networks (LWN)</li> <li>• Population served by water networks (PSWN)</li> </ul>                                                     |
| Capacity           | <ul style="list-style-type: none"> <li>• Productivity (P)</li> <li>• Citizens above poverty line (CAPL)</li> <li>• Illiteracy (I)</li> <li>• Average unit price of water (AUPW)</li> </ul>                                          |
| Environment        | <ul style="list-style-type: none"> <li>• Population connected to sewer networks (PCSN)</li> <li>• Contaminated water samples by coliform (CWSC)</li> <li>• NO<sub>3</sub> concentrations in groundwater (NO<sub>3</sub>)</li> </ul> |
| Resources          | <ul style="list-style-type: none"> <li>• Per capita domestic water supply (PCDWS)</li> </ul>                                                                                                                                        |
| Use                | <ul style="list-style-type: none"> <li>• Per capita domestic water consumption (PCDWC)</li> </ul>                                                                                                                                   |

**Table 2: AHP pairwise comparison matrix for domestic water poverty index**

| Criteria        | TCW  | LWN  | PSWN | P    | CAPL | I    | AUPW | PCSN | CWSC | NO <sub>3</sub> | PCDWS | PCDWC | Weight |
|-----------------|------|------|------|------|------|------|------|------|------|-----------------|-------|-------|--------|
| TCW             | 1.00 | 3.00 | 2.00 | 5.00 | 5.00 | 7.00 | 2.00 | 3.00 | 0.50 | 2.00            | 4.00  | 0.50  | 0.12   |
| LWN             | 0.33 | 1.00 | 0.50 | 3.00 | 4.00 | 5.00 | 0.50 | 2.00 | 0.20 | 0.50            | 2.00  | 0.17  | 0.07   |
| PSWN            | 0.50 | 2.00 | 1.00 | 4.00 | 5.00 | 5.00 | 2.00 | 3.00 | 0.50 | 2.00            | 4.00  | 0.33  | 0.10   |
| P               | 0.20 | 0.33 | 0.25 | 1.00 | 2.00 | 3.00 | 0.25 | 0.50 | 0.14 | 0.33            | 0.50  | 0.13  | 0.03   |
| CAPL            | 0.20 | 0.25 | 0.20 | 0.50 | 1.00 | 2.00 | 0.25 | 0.33 | 0.14 | 0.25            | 0.50  | 0.13  | 0.02   |
| I               | 0.14 | 0.20 | 0.20 | 0.33 | 0.50 | 1.00 | 0.20 | 0.25 | 0.13 | 0.20            | 0.33  | 0.11  | 0.01   |
| AUPW            | 0.50 | 2.00 | 0.50 | 4.00 | 4.00 | 5.00 | 1.00 | 3.00 | 0.33 | 2.00            | 3.00  | 0.25  | 0.09   |
| PCSN            | 0.33 | 0.50 | 0.33 | 2.00 | 3.00 | 4.00 | 0.33 | 1.00 | 0.20 | 0.50            | 2.00  | 0.17  | 0.05   |
| CWSC            | 2.00 | 5.00 | 2.00 | 7.00 | 7.00 | 8.00 | 3.00 | 5.00 | 1.00 | 4.00            | 6.00  | 0.50  | 0.18   |
| NO <sub>3</sub> | 0.50 | 2.00 | 0.50 | 3.00 | 4.00 | 5.00 | 0.50 | 2.00 | 0.25 | 1.00            | 3.00  | 0.20  | 0.08   |
| PCDWS           | 0.25 | 0.50 | 0.25 | 2.00 | 2.00 | 3.00 | 0.33 | 0.50 | 0.17 | 0.33            | 1.00  | 0.14  | 0.04   |
| PCDWC           | 2.00 | 6.00 | 3.00 | 8.00 | 8.00 | 9.00 | 4.00 | 6.00 | 2.00 | 5.00            | 7.00  | 1.00  | 0.21   |

330 **Table 3: The AHP pairwise comparison matrix for domestic rainwater harvesting suitability index**

| Criteria | RD   | CN   | SS   | LU   | Weight |
|----------|------|------|------|------|--------|
| RD       | 1.00 | 1.50 | 1.50 | 2.50 | 0.35   |
| CN       | 0.67 | 1.00 | 1.50 | 2.50 | 0.31   |
| SS       | 0.67 | 0.67 | 1.00 | 1.50 | 0.21   |
| LU       | 0.40 | 0.40 | 0.67 | 1.00 | 0.13   |

331

**Table 4: DWP scoring assigned for the sub-criteria**

| # | Criteria | Sub-criteria    | Score | #  | Criteria        | Sub-criteria               | Score |
|---|----------|-----------------|-------|----|-----------------|----------------------------|-------|
| 1 | TCW      | <6 (days/month) | 10    | 7  | AUPW            | >5.2 (NIS/m <sup>3</sup> ) | 9     |
|   |          | 6-12            | 8     |    |                 | 4.6-5.2                    | 7     |
|   |          | 13-19           | 6     |    |                 | 3.9-4.5                    | 5     |
|   |          | 20-26           | 4     |    |                 | 3.2-3.8                    | 3     |
|   |          | >26             | 2     |    |                 | <3.2                       | 1     |
| 2 | LWN      | ≥36 (%)         | 8     | 8  | PCSN            | ≤20 (%)                    | 10    |
|   |          | 31-35.9         | 7     |    |                 | 21-30                      | 9     |
|   |          | 26-30.9         | 5     |    |                 | 31-40                      | 8     |
|   |          | 21-25.9         | 4     |    |                 | 41-50                      | 7     |
|   |          | <21             | 2     |    |                 | >50                        | 5     |
| 3 | PSWN     | 76-80 (%)       | 6     | 9  | CWSC            | 26-30 (%)                  | 10    |
|   |          | 81-85           | 5     |    |                 | 21-25                      | 8     |
|   |          | 86-90           | 4     |    |                 | 16-20                      | 6     |
|   |          | 91-95           | 3     |    |                 | 11-15                      | 4     |
|   |          | 96-100          | 1     |    |                 | 6-10                       | 2     |
| 4 | P        | <1 (Emp/1000 c) | 9     | 10 | NO <sub>3</sub> | ≥80 (mg/l)                 | 10    |
|   |          | 1.0-1.4         | 7     |    |                 | 60-79                      | 8     |
|   |          | 1.5-1.9         | 5     |    |                 | 40-59                      | 6     |
|   |          | 2.0-2.4         | 3     |    |                 | 20-39                      | 3     |
|   |          | ≥2.5            | 1     |    |                 | <20                        | 1     |
| 5 | CAPL     | 65.1-72 (%)     | 9     | 11 | PCDWS           | <80                        | 10    |
|   |          | 72.1-79         | 7     |    |                 | 80-119                     | 8     |
|   |          | 79.1-86         | 5     |    |                 | 120-159                    | 7     |
|   |          | 86.1-93         | 3     |    |                 | 160-199                    | 5     |
|   |          | 93.1-100        | 1     |    |                 | ≥200                       | 2     |
| 6 | I        | 4.5-5.0 (%)     | 6     | 12 | PCDWC           | <40                        | 10    |
|   |          | 3.9-4.4         | 5     |    |                 | 40-79                      | 8     |
|   |          | 3.3-3.8         | 4     |    |                 | 80-119                     | 6     |
|   |          | 2.7-3.2         | 3     |    |                 | 120-159                    | 4     |
|   |          | 2.1-2.6         | 2     |    |                 | ≥160                       | 2     |



334

**Table 5: The domestic rainwater harvesting suitability scoring assigned for the sub-criteria**

| # | Criteria | Sub-criteria     | Score | # | Criteria | Sub-criteria                          | Score |
|---|----------|------------------|-------|---|----------|---------------------------------------|-------|
| 1 | RD       | 153.0-262.1 (mm) | 1     | 3 | SS       | ≥24.0                                 | 1     |
|   |          | 262.2-371.3      | 3     |   |          | 18-23.9                               | 3     |
|   |          | 371.4-480.5      | 5     |   |          | 12-17.9                               | 5     |
|   |          | 480.6-589.7      | 7     |   |          | 6-11.9                                | 7     |
|   |          | 589.8-699.0      | 9     |   |          | ≤5.9                                  | 9     |
| 2 | CN       | ≤50              | 1     | 4 | LU       | Israeli settlements                   | 1     |
|   |          | 51-60            | 3     |   |          | Forest and rough grazing              | 3     |
|   |          | 61-70            | 5     |   |          | Permanent crops and irrigated farming | 3     |
|   |          | 71-80            | 7     |   |          | Arable land                           | 3     |
|   |          | >80              | 9     |   |          | Built-up areas                        | 7     |

335
